# Supplementary material for: Comparison of plasma technology for the study of herbicide degradation
Source: Royal Society of Chemistry journal article supplement (doi:10.1039/d3ra00459g), 2023-01-01
Supplement: d3ra00459g1.pdf [file d3ra00459g1.pdf]

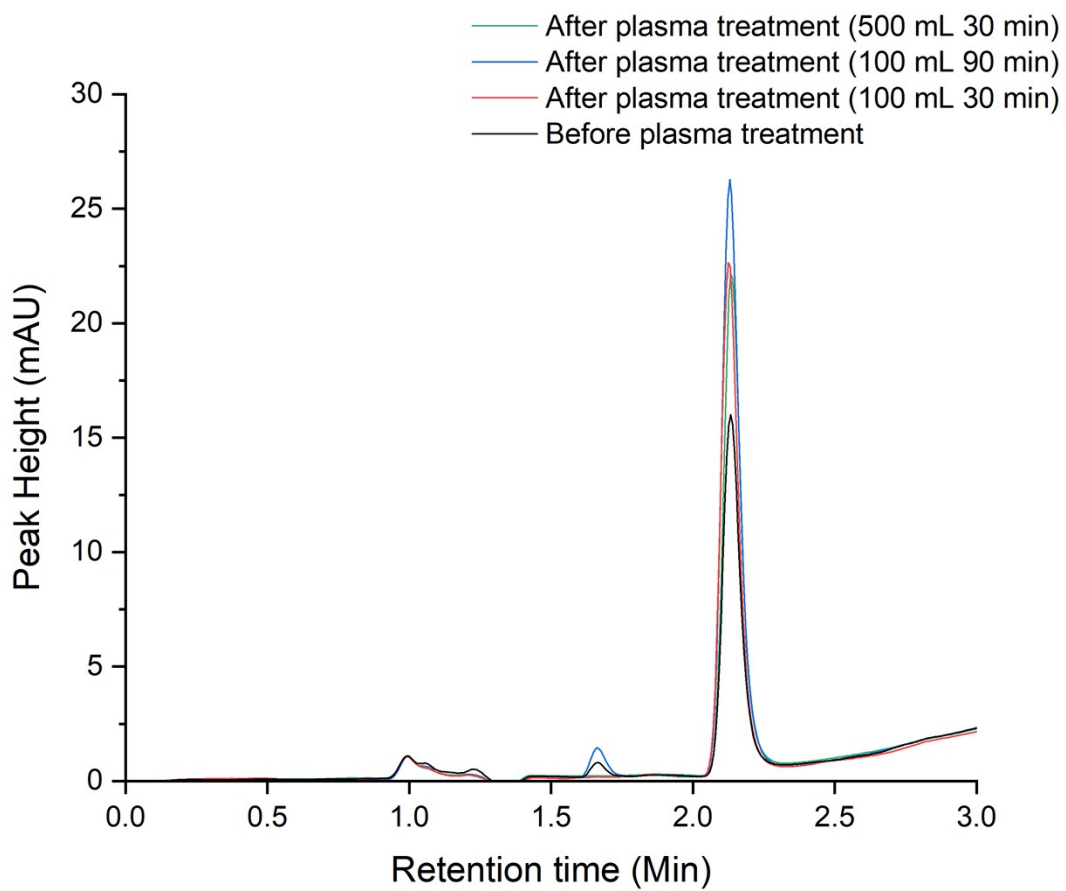

Supplementary Figure 1.  
HPLC chromatogram of diuron before and after plasma treatment via  
gliding arc plasma system.

HPLC chromatogram of diuron before and after plasma treatment via  
gliding arc plasma system.

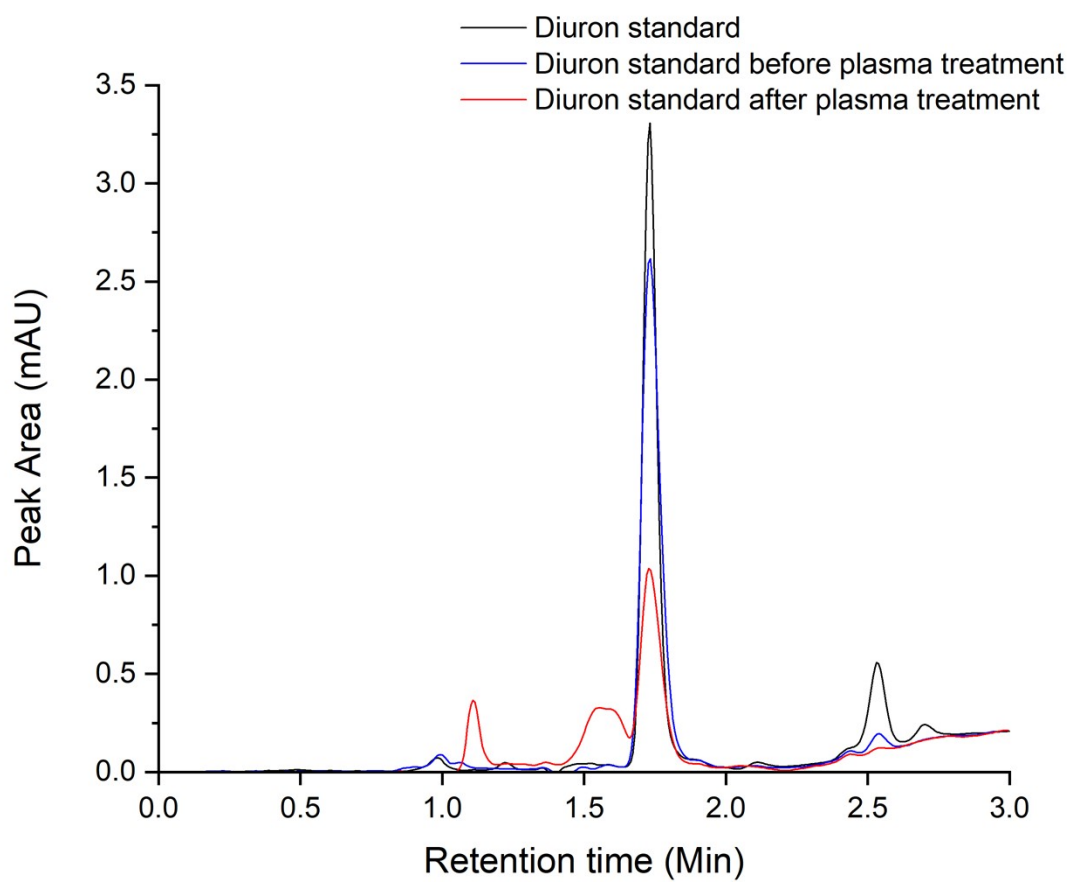

Supplementary Figure 2. HPLC chromatogram of diuron before and after plasma treatment (1) via pinhole plasma jet system.

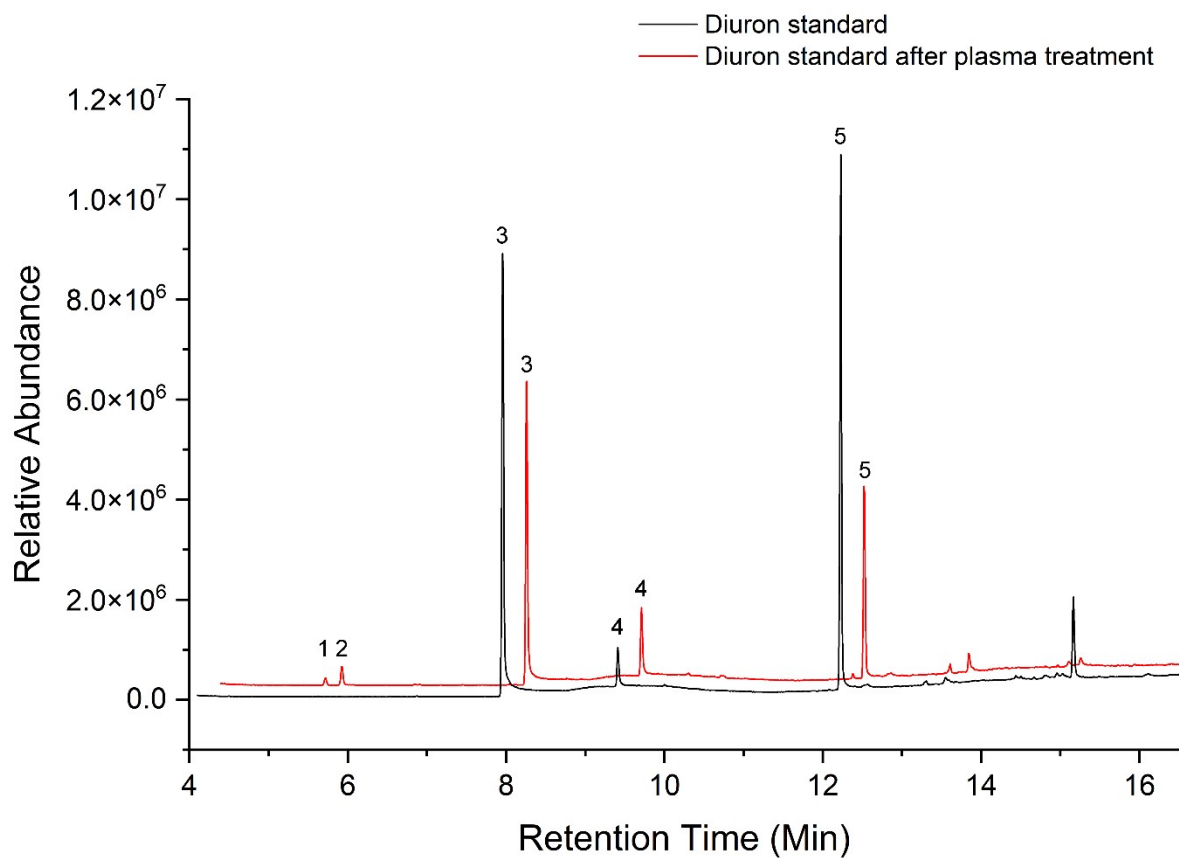

Supplementary Figure 3. GC-MS chromatogram of diuron standard before and after pinhole plasma jet treatment. Peaks identification were 1: 1-chloro-3-isocyanato-benzene; 2: 1-chloro-4-isocyanato-benzene; 3: 1,2-dichloro-4-isocyanato-benzene; 4: 3,4-dichloro-benzenamine, and 5: 3-(3,4-dichlorophenyl)-1,1-dimethylurea (diuron).
